# Supplementary material
Source: PubMed Central journal article supplement (PMC3271441)
Supplement: NIHMS256120-supplement-Supplementary_Figures_and_Tables.pdf [file NIHMS256120-supplement-Supplementary_Figures_and_Tables.pdf]

Supplementary Information for

## **Inactivating mutations of acetyltransferase genes in B-cell lymphoma**

Laura Pasqualucci<sup>1,2\*</sup>, David Dominguez-Sola<sup>1</sup>, Annalisa Chiarenza<sup>1</sup>, Giulia Fabbri<sup>1</sup>, Adina Grunn<sup>1</sup>, Vladimir Trifonov<sup>3</sup>, Lawryn H. Kasper<sup>4</sup>, Stephanie Lerach<sup>4</sup>, Honjyan Tang<sup>1</sup>, Jing Ma<sup>5</sup>, Davide Rossi<sup>6</sup>, Vundavalli V. Murty<sup>1,2</sup>, Charles G. Mullighan<sup>7</sup>, Gianluca Gaidano<sup>6</sup>, Raul Rabadan<sup>3</sup>, Paul K. Brindle<sup>4</sup> and Riccardo Dalla-Favera<sup>1,2,8\*</sup>

<sup>1</sup>*Institute for Cancer Genetics and the Herbert Irving Comprehensive Cancer Center,* <sup>2</sup>*Department of Pathology & Cell Biology,* <sup>3</sup>*Department of Biomedical Informatics and the Center for Computational Biology and Bioinformatics,* and <sup>8</sup>*Department of Genetics & Development, Columbia University, New York, NY 10032, USA.*

<sup>4</sup>*Department of Biochemistry,* <sup>5</sup>*The Hartwell Center for Bioinformatics and Biotechnology,* and <sup>7</sup>*Department of Pathology, St Jude Children's Research Hospital, Memphis, TN 38105, USA.*

<sup>6</sup>*Division of Hematology, Department of Clinical and Experimental Medicine and IRCAD, Amedeo Avogadro University of Eastern Piedmont, Novara, Italy.*

\*To whom correspondence should be addressed. E-mail: [lp171@columbia.edu](mailto:lp171@columbia.edu); [rd10@columbia.edu](mailto:rd10@columbia.edu)

## SUPPLEMENTARY METHODS

**Cell lines.** The following DLBCL cell lines were used in the study: OCI-Ly3, OCI-Ly10, HBL1, SUDHL-2, U2932, RIVA, RC-K8, OCI-Ly1, OCI-Ly4, OCI-Ly7, OCI-Ly8, OCI-Ly18, SUDHL-4, SUDHL-5, SUDHL-6, SUDHL-7, SUDHL-8, SUDHL-10, DB, BJAB, FARAGE, VAL, and WSU. All cell lines were maintained in Iscove's Modified Dulbecco Medium (IMDM) supplemented with 10% FBS, 100 µg/mL penicillin, 100 µg/mL streptomycin and 2 mM L-glutamine, except for OCI-Ly10 and OCI-Ly4, which were cultured in IMDM with 20% heparinized human plasma and 55 µM β-mercaptoethanol. HEK293T, H1299 and HeLa cells were maintained in Dulbecco's modified Eagle's medium (DMEM) supplemented with 10% FBS, 100 µg/mL penicillin, and 100 µg/mL streptomycin. The following BL cell lines were included in the mutation analysis of *CREBBP* and *EP300*: Ramos, P3HRI, BL113, DAUDI, RAJI, ODHI1, MUTU1.

**Primary tumor samples.** Primary biopsies from 111 newly diagnosed, previously untreated DLBCL patients were obtained as paraffin-embedded and/or frozen material from the archives of the Departments of Pathology at Columbia University, Weill Cornell Medical College, and the Department of Clinical and Experimental Medicine at the University of Novara, after approval by the respective Institutional Review Boards. The fraction of tumor cells, assessed by southern blot analysis of the rearranged immunoglobulin heavy chain locus and/or by histologic analysis of frozen sections isolated before and after obtaining tissue for molecular studies, corresponded to >80% in most of the cases and to >50% in all cases. The DLBCL cohort (cell lines and primary biopsies) comprised 65 GCB-DLBCL, 54 ABC/non-GC-DLBCL, and 5 unclassified (NC) cases, as determined previously<sup>1</sup> based on gene expression profile analysis<sup>2</sup> (available for 113

samples) or immunohistochemical stains<sup>3</sup> (n=11). None of the patients included in the study had a history of RTS. High molecular weight genomic DNA from 46 FL, 53 CLL, 23 BL and 11 MZL patients were provided by the Department of Clinical and Experimental Medicine, University of Novara, and by the Department of Pathology at Columbia University.

**Copy number determination of *CREBBP* and *EP300* in DLBCL by high-density SNP array analysis.** Genome-wide DNA profiles were obtained from high molecular weight genomic DNA of DLBCL patients using the Affymetrix Genome-Wide Human SNP Array 6.0 (Affymetrix, Santa Clara, CA, USA) following the manufacturer's instructions. Image data analysis and quality control for the hybridized samples were performed using the Affymetrix Genotyping Console 3.0.1 software, and only samples passing the Affymetrix recommended contrast QC and SNP call rates threshold (in the Birdseed v2.0 algorithm) were considered for analysis. Affymetrix CEL files and corresponding SNP genotype call files generated by the Affymetrix Genotyping Console tool were then analyzed using the dCHIP software<sup>4</sup> according to a previously published workflow<sup>5,6</sup>. Model-based expression was performed using the perfect-match (PM) model to summarize signal intensities for each probe set. Probe intensity data for each array were normalized using a diploid reference set of 3 normal (non tumor) DNA samples that had been processed and hybridized in the same experiment as the tumor samples. The standard invariant-set normalization approach in dCHIP was implemented by a karyotype guided normalization method as described in detail in Ref. 5 and 6. Candidate genomic regions of amplification and deletion were identified by applying the circular binary segmentation (CBS) algorithm

to the SNP array data as described<sup>5,7</sup>, with the following criteria: i) mean log<sub>2</sub> ratios of  $\geq 0.2$  or  $\leq -0.2$  ( $\geq 0.15$  or  $\leq -0.15$  in two cases where the % of tumor cells in the biopsy was estimated to be ~60%); ii)  $\geq 8$  SNP markers (SNP and/or CNV) within a segment. The results of the CBS algorithm were then compared to those of dChip. To exclude calls of genomic gains or loss arising from inherited genomic CNV, the dChipSNP algorithm was also applied to 130 normal DNAs from an independent study<sup>5</sup> as well as to 230 normal DNAs from the HapMap project; alterations identified in the pool of reference samples were assumed to be inherited and therefore excluded. In addition, CNV were excluded if present in the Database of Genomic Variants (<http://projects.tcag.ca/cgi-bin/variation/gbrowse/hg18/>).

**cDNA synthesis and RT-PCR analysis.** Total RNA was treated with DNase prior to cDNA synthesis, according to the manufacturer's instructions. The cDNA was then used as a template in PCR amplification reactions. For detection of the normal and mutant *CREBBP* and *EP300* alleles in affected samples, primers were designed based on the transcript sequences surrounding the validated mutations, and the amplified PCR products were then analyzed by direct sequencing or by cloning and sequencing.

**Gene expression data.** Gene expression profile analysis of normal B cells and primary DLBCL cases was performed using Affymetrix HG-U133Plus 2.0 arrays as part of an independent study (GEO database GSE12195)<sup>1</sup>. The probe sets used in Fig. S12 are 228177\_at (*CREBBP*) and 202221\_s\_at (*EP300*).

**Construction of mammalian expression vectors encoding for mutated HA-tagged CREBBP proteins.** All CREBBP missense mutants were generated by a site-directed mutagenesis protocol using a previously described mammalian expression vector encoding the mouse Crebbp protein with a C-terminal HA tag as a template (pCIN4-CREBBP-HA, a kind gift of Dr W. Gu). The presence of the desired mutations and the integrity of the open reading frame (ORF) were confirmed in all constructs by enzymatic digestion and full-length sequencing. In western blot analyses, the R1360X construct, which contains a stop codon N-terminal to the HA tag, can only be detected by the anti-CREBBP specific N-22 antibody.

**Modeling of CREBBP HAT domain missense mutations.** The structural view of the CREBBP HAT domain was generated in the PyMOL v0.99 software (available at <http://www.pymol.org>) using the coordinates of the crystal structure of the EP300 HAT domain (85% identity with CREBBP) in complex with the Lys-CoA (MMDB ID 62423).

**Immunofluorescence analysis of exogenous CREBBP proteins.** For analysis of mutant CREBBP subcellular localization, HeLa cells were transiently transfected with plasmids encoding wild-type or mutant CREBBP-HA cDNAs, harvested by trypsinization 30 hr after transfection, and used to prepare cytospins according to standard methods. After fixation in 10% buffered formalin for 15 minutes at room temperature, cells were permeabilized for 10 minutes in 0.2% Triton X-100 in PBS, blocked for 30 min in PBS-Tween with 3% bovine serum albumin (BSA), and incubated 90 min at room temperature in blocking buffer containing a 1:200 dilution of a FITC-conjugated anti-HA antibody

(clone 11.1, Covance). Images were captured using the Nikon NES software coupled to a Nikon ES400 fluorescence microscope with a B/W camera, and artificially colored using Adobe Photoshop.

**Isolation of recombinant GST-p53 and CREBBP-HA proteins.** Rosetta *E.coli* bacteria containing a GST-p53 expression plasmid were kindly provided by W.Gu and the procedure used for purification of the recombinant protein is described in detail elsewhere<sup>8</sup>. Briefly, GST-p53 expression was induced with 1mM IPTG overnight at 23-25°C and the recombinant protein was obtained from bacteria cell lysates in BC500 using glutathione-coated agarose beads, upon 90 minutes incubation at 4°C. After several washing steps, GST-p53 recombinant protein was eluted using BC100 buffer containing 20 mM glutathione. The concentration of GST-p53 in the eluates was assessed by commassie staining upon SDS-PAGE (Figure S8b). Recombinant CREBBP-HA proteins (WT and selected mutants) were isolated from transiently transfected HEK293T cells. Briefly, 48 hr after transfection the cells were harvested in cold PBS and lysed in BC500 (20mM Tris pH 7.5, 500 mM NaCl, 10% Glycerol, 0.2 mM EDTA, 1% Triton X-100, 1mM PMSF, 0.1 mM sodium orthovanadate and protease inhibitors). Cleared lysates were supplemented with 5M NaCl to a final concentration to 650 mM, and CREBBP-HA was immunoprecipitated overnight at 4°C using agarose-conjugated HA beads (Sigma). After several washes in BC500 and BC100, proteins were eluted in BC100 containing 500 µg/mL HA peptide (Sigma) twice, at 4°C. The two fractions were pooled and resolved by SDS-PAGE, followed by commassie blue staining to assess protein purity and concentration (see Fig. S8c).

## SUPPLEMENTARY FIGURE LEGENDS

### **Supplementary Figure 1. The *CREBBP* locus is targeted by focal deletions in DLBCL.**

**a**, Distribution of SNP markers covering the *CREBBP* locus in the Affymetrix Genome-Wide Human SNP array 6.0, as obtained from the University of California Santa Cruz genome browser (<http://genome.ucsc.edu/cgi-bin/hgGateway>) using the NCBI36.1/hg18 annotation. **b**, Graphic representation of segmentation data from the 9 DLBCL samples carrying *CREBBP* deletions, visualized using the Integrative Genomics Viewer software (<http://www.broadinstitute.org/igv>). Each track represents one sample, where white denotes a normal (diploid) copy number, blue indicates a region of copy number loss, and red corresponds to a region of copy number gain (data range for minimum, baseline and maximum value: -1.5, 0, 1.5). Note that, due to the presence of non-tumor cells infiltrating the biopsy, the inferred copy number, and the corresponding color intensity, may vary across samples (see actual values in Table S2). Individual genes in the region are aligned in the bottom panel, and the boxed area (defined by the red bar at the top) corresponds to the *CREBBP* locus. Numbers indicate the genomic coordinates of the displayed region on chromosome 16p. **c**, Copy number plots of the four DLBCL samples showing focal deletions encompassing the *CREBBP* locus (boxed area), as compared to a normal diploid DNA. In each plot, a red line denotes a baseline level of 2.

### **Supplementary Figure 2. *CREBBP* is mutated in a large fraction of FL cases. a**,

Distribution of FL-associated point mutations along the *CREBBP* gene and protein, graphically represented as described in Fig. 1a. **b**, Prevalence of *CREBBP* mutated cases in

various B-NHL types. **c**, Overall frequency of *CREBBP* mutations, according to mutation type.

**Supplementary Figure 3. The *EP300* gene is mutated in a small fraction of DLBCL and FL.**

**a**, Schematic representation of the EP300 protein, with its key functional domains. Color-coded symbols indicate distinct types of mutational events, and the corresponding number is given in brackets. **b**, Overall frequency of *EP300* mutated samples in various B-NHL, including DLBCL cell lines, DLBCL primary cases, FL, BL, and MZL. In the DLBCL bar graph, red and blue colors are used to indicate the phenotypic subtype of the affected cases. **c**, Graphic representation of segmentation data from 6 DLBCL primary biopsies carrying *EP300* deletions, visualized as described in Fig. S1b. Individual genes in the region are aligned in the bottom panel, and numbers indicate the genomic coordinates of the displayed region on chromosome 22q13.2. Two additional cell lines carrying aberrant *EP300* alleles do not appear in the plot since the loss of *EP300* was documented by different methods. These include SUDHL2, where deletion of one allele was documented by FISH analysis, and RC-K8, which has been reported in the literature<sup>9</sup> (see also Table S4). **d**, Venn diagram showing the overlap between cases carrying genomic lesions of *CREBBP* and *EP300* in DLBCL (top) and FL (bottom). Note that four of the six DLBCL samples harboring alterations in both genes are represented by cell lines. Diagrams were generated by using the interactive tool VENNY at <http://bioinfogp.cnb.csic.es/tools/venny/index.html>.



**Supplementary Figure 4. The residual wild-type *CREBBP* allele is expressed, suggesting haploinsufficiency.** Chromatograms of PCR products amplified from genomic DNA (gDNA) and cDNA (bottom) of representative DLBCL cell lines harboring *CREBBP* mutations. The presence of a double peak in the cDNA sequence (arrows) documents expression of both wild-type and mutated allele.

**Supplementary Figure 5. Most *CREBBP* missense mutations cluster in the HAT domain, proximal to the lysine acetylation reaction center.** **a**, Crystal structure of the EP300 HAT domain (85% identity with *CREBBP*) in complex with the Lys-CoA (MMDB ID 62423). Residues targeted by somatic point mutations in DLBCL and FL are highlighted in blue (or red if recurrently mutated). Note their clustering around the pocket that accommodates the Lys-CoA bisubstrate, mimicking the lysine side chain from native protein substrates, in close proximity to Ac-CoA<sup>10</sup>. **b**, Ribbon diagram of the HAT domain (front view). Lys-CoA is shown in aquamarine stick figure representation, while the mutated residues are color-coded in pink. **c**, Ribbon diagram of the HAT domain (back view), with the Lys-CoA represented in aquamarine, and the mutated residues color-coded in pink.

**Supplementary Figure 6. *CREBBP* acetylates and inactivates the *BCL6* transcriptional repressor.** **a**, Co-immunoprecipitation of *CREBBP*-HA and *BCL6* in transfected HEK293T cells confirms their physical interaction, as previously shown for EP300<sup>11</sup>. **b**, Dose dependent response of a 5X-*BCL6* luciferase reporter construct to *BCL6*, in the absence or presence of increasing *CREBBP*-HA amounts. Results are shown as

relative activity compared to the basal reporter activity, set as 1 (white bar) (mean +/- standard deviation, as obtained from one of two independent experiments, performed in duplicate). Western blot analysis using anti-HA and anti-BCL6 antibodies monitors for the relative expression levels of exogenous CREBBP and BCL6 in the same lysates (bottom panels).

**Supplementary Figure 7. Failure of CREBBP missense mutants to acetylate BCL6**

**and p53 is not due to loss of physical interaction.** **a,** Subcellular localization of wild-type and mutant CREBBP proteins in HeLa cells, transiently transfected with expression plasmids encoding for the corresponding HA-tagged cDNAs and analyzed by immunofluorescence using specific antibodies directed against the HA tag. Nuclei are counterstained with DAPI, and the signal corresponding to HA is artificially colored in red. **b,** Western blot analysis of whole cell extracts from HEK293T cells co-transfected with Flag-p53 and the indicated CREBBP-HA derivatives, before (inputs) and after immunoprecipitation with Flag/M2 antibodies. **c,** HEK293T cells were transiently transfected with plasmids expressing Flag-tagged human BCL6 and HA-tagged mouse CREBBP proteins (wild-type vs the indicated DLBCL-derived point mutants), and the presence of exogenous CREBBP in the complex was measured by western blot analysis using anti-HA antibodies after immunoprecipitation with Flag/M2 beads (top panel). Western blot analysis with anti-BCL6 antibodies in the total protein extracts before immunoprecipitation (inputs) controls for the expression levels of exogenous BCL6, and  $\beta$ -actin is used as protein loading control. The acetylation status of BCL6 was assessed in the same Flag immunoprecipitates by using anti-acetyl-lysine specific antibodies. Note that the

amounts of pCMV-Flag-BCL6 and pCIN4-CREBBP-HA DNAs were adjusted in the transfection in order to obtain comparable expression levels for each of the proteins across the samples. Numbering of the mutated residues is based on the human CREBBP amino acid sequence.

**Supplementary Figure 8. Coomassie blue staining of purified recombinant CREBBP-HA (a) and GST-p53 (b) proteins used in the *in vitro* acetylation assays.** In (b), each lane corresponds to increasing dilutions of the original eluate stock.

**Supplementary Figure 9. DLBCL-associated CREBBP mutations have variable effects on cAMP-dependent gene expression and are incapable of rescuing the growth phenotype of conditional *Crebbp/Ep300* double null MEFs.** **a**, Immunofluorescence analysis of CREBBP protein expression in wild-type and *Crebbp/Ep300* null (dKO) MEFs transduced with retroviral vectors expressing various HA-tagged CREBBP proteins. DAPI identifies the nuclei. **b**, Heat map of hierarchically clustered qRT-PCR gene expression data in *Crebbp/Ep300* dKO MEFs reconstituted with retroviruses expressing wild-type CREBBP (+CREBBP) or various CREBBP mutants (as indicated), and treated with forskolin + IBMX (FI) for 90 min (n=2-5). Data are expressed as log ratio of the wild-type MEF signal. All four DLBCL-derived CREBBP mutants tested were generally deficient for cAMP-responsive transcription, as was the W1502A/Y1503S HAT-dead mutation<sup>12</sup> (used as negative control), although individual CREB target genes displayed different levels of dependence on HAT activity. **c**, Proliferative capacity of conditional *Crebbp/Ep300* dKO MEFs reconstituted with retroviruses expressing wild-type (WT)

CREBBP or the indicated CREBBP mutant alleles. From each reconstituted population, equivalent numbers of YFP<sup>+</sup> (dKO) MEFs were seeded at day 1, and the total number of YFP<sup>+</sup> cells was measured on Day 11 by flow cytometry, as described in the methods section. Data are expressed as a percentage of the total cell number (n=1-3; mean $\pm$ S.E.M.).

**Supplementary Figure 10. Quantitative RT-PCR analysis of CREB target gene expression.** **a-j,** qRT-PCR gene expression data from wild-type MEFs, untransduced *Crebbp/Ep300* dKO MEFs, and dKO MEFs reconstituted with retroviruses expressing wild-type (+CREBBP) or the indicated mutant HA-tagged CREBBP, and treated for 90 min with forskolin+IBMX (FI) or Ethanol vehicle (EtOH). The W1502A/Y1503S HAT-dead mutation is included as control<sup>12</sup>. Gene expression of individual genes was normalized to expression of *Pgk1*, and is shown as mean values  $\pm$  SEM, as obtained from 2-5 independent experiments.

**Supplementary Figure 11. DLBCL-associated mutations in *CREBBP* affect H3K18 acetylation.** **a,** Immunofluorescence analysis of histone H3 lysine 18 acetylation (H3K18Ac) in wild type and dKO MEFs, non-transduced or transduced with retrovirus expressing HA-tagged CREBBP proteins (wild type and the indicated mutants). White arrows point to cells that did not delete endogenous *Crebbp* and *Ep300*, and do not express the HA-tagged *Crebbp* construct, thus serving as a reference for endogenous levels of H3K18Ac. **b,** Signal intensity ratio of H3K18Ac versus exogenous CREBBP (HA) for individual nuclei from the same populations shown in (a) (mean  $\pm$  SEM; n=34-65).

Mutated CREBBP proteins showed significantly reduced ability to induce H3K18Ac, independent of retrovirus transduction efficiency (Tukey's post-hoc test of one-way ANOVA for the pairs indicated).

**Supplementary Figure 12. Expression of CREBBP and EP300 mRNA in normal and transformed B cells.** **a, b,** CREBBP and EP300 mRNA expression levels in purified normal B cell subpopulations and DLBCL samples (cell lines and primary biopsies), as measured by Affymetrix U133p2 gene expression profile analysis. Data are expressed as absolute probe values after MAS5 normalization. Each dot corresponds to an individual sample, color-coded based on the presence or absence of distinct genetic lesions. CB/CC, GC-derived centroblasts and centrocytes; Na/Me, non-GC naïve and memory B cells (each purified from 5 different individuals); ABC, activated B cell type; GCB, germinal center B cell type. Arrow points to the homozygously deleted DLBCL case 2147. The SUDHL2 cell line was negative for EP300 expression by northern blot analysis (see Fig. 3d).

## References

1. Compagno, M. et al. Mutations of multiple genes cause deregulation of NF-kappaB in diffuse large B-cell lymphoma. *Nature* **459**, 717-21 (2009).
2. Wright, G. et al. A gene expression-based method to diagnose clinically distinct subgroups of diffuse large B cell lymphoma. *Proc Natl Acad Sci U S A* **100**, 9991-6 (2003).
3. Hans, C.P. et al. Confirmation of the molecular classification of diffuse large B-cell lymphoma by immunohistochemistry using a tissue microarray. *Blood* **103**, 275-82 (2004).
4. Lin, M. et al. dChipSNP: significance curve and clustering of SNP-array-based loss-of-heterozygosity data. *Bioinformatics* **20**, 1233-40 (2004).
5. Mullighan, C.G. et al. Genome-wide analysis of genetic alterations in acute lymphoblastic leukaemia. *Nature* **446**, 758-64 (2007).
6. Pounds, S. et al. Reference alignment of SNP microarray signals for copy number analysis of tumors. *Bioinformatics* **25**, 315-21 (2009).

7. Venkatraman, E.S. & Olshen, A.B. A faster circular binary segmentation algorithm for the analysis of array CGH data. *Bioinformatics* **23**, 657-63 (2007).
8. Gu, W., Shi, X.L. & Roeder, R.G. Synergistic activation of transcription by CBP and p53. *Nature* **387**, 819-23 (1997).
9. Garbati, M.R., Alco, G. & Gilmore, T.D. Histone acetyltransferase p300 is a coactivator for transcription factor REL and is C-terminally truncated in the human diffuse large B-cell lymphoma cell line RC-K8. *Cancer Lett* **291**, 237-45 (2010).
10. Liu, X. et al. The structural basis of protein acetylation by the p300/CBP transcriptional coactivator. *Nature* **451**, 846-50 (2008).
11. Bereshchenko, O.R., Gu, W. & Dalla-Favera, R. Acetylation inactivates the transcriptional repressor BCL6. *Nat Genet* **32**, 606-13 (2002).
12. Bordoli, L. et al. Functional analysis of the p300 acetyltransferase domain: the PHD finger of p300 but not of CBP is dispensable for enzymatic activity. *Nucleic Acids Res* **29**, 4462-71 (2001).

a

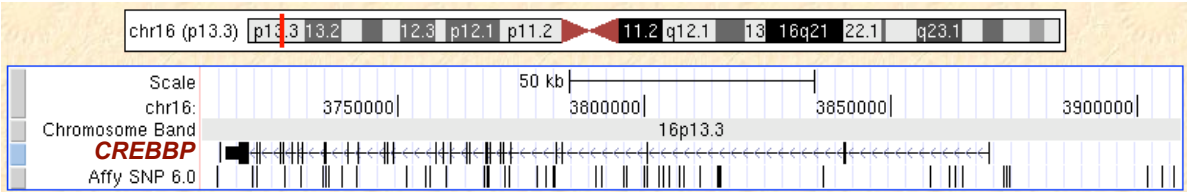

b

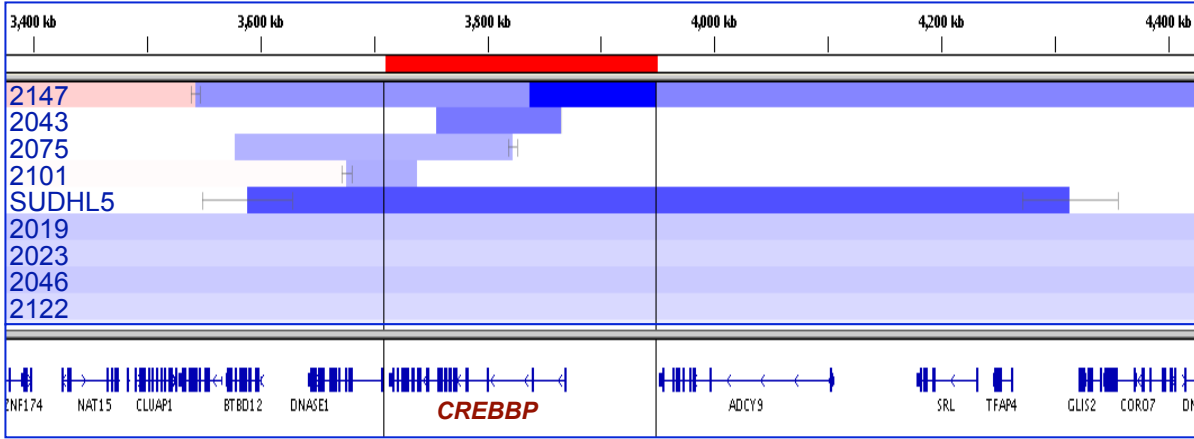

c

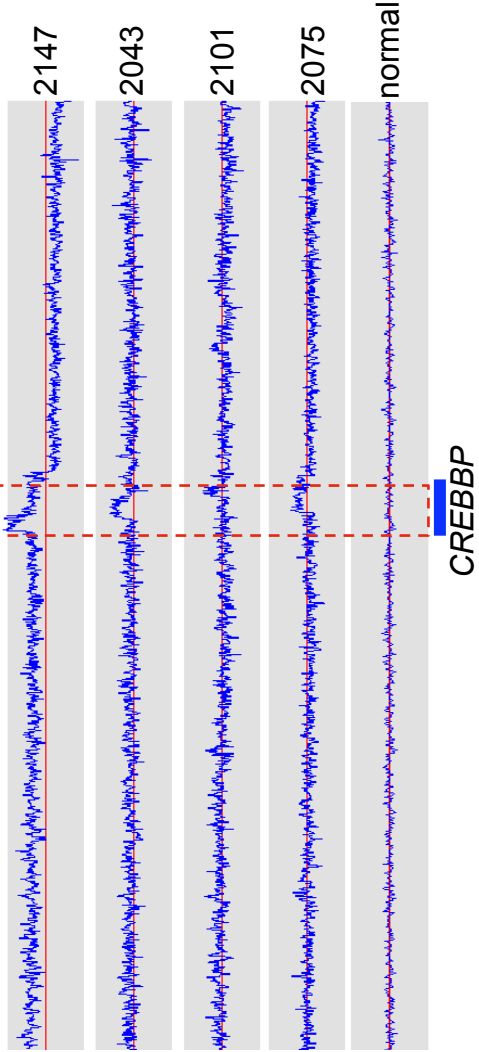

**a**

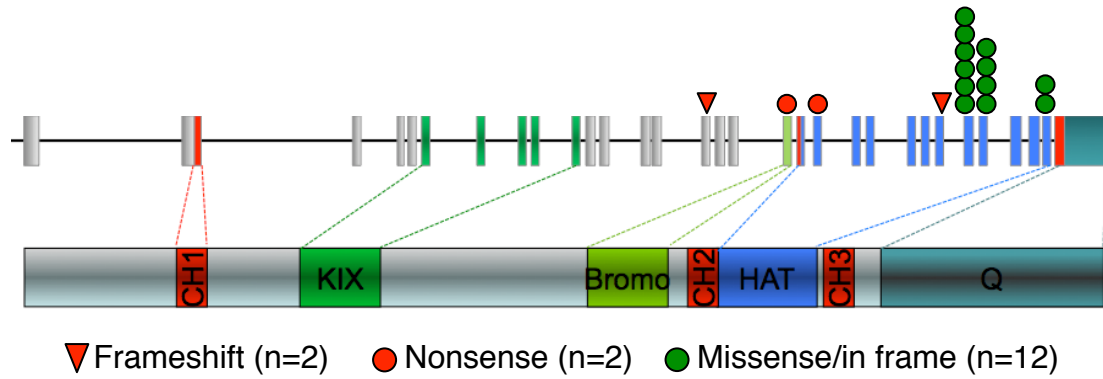

**b**

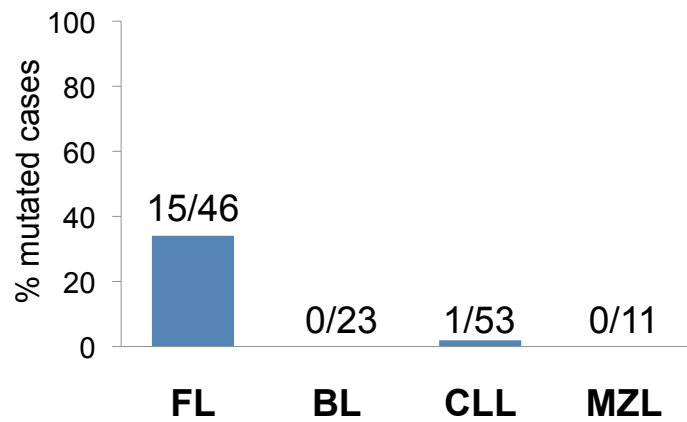

**c**

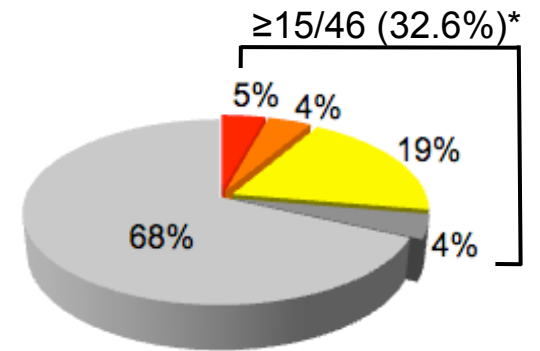

- Frameshift mutation
- Nonsense mutation
- Missense mutation, HAT domain
- Missense mutation, outside HAT
- Unmutated

\*Deletion data not available



**a**

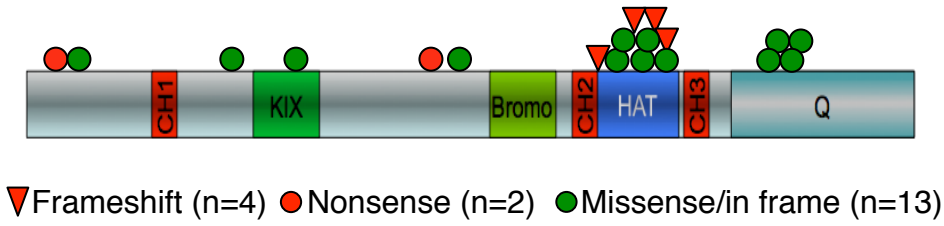

**b**

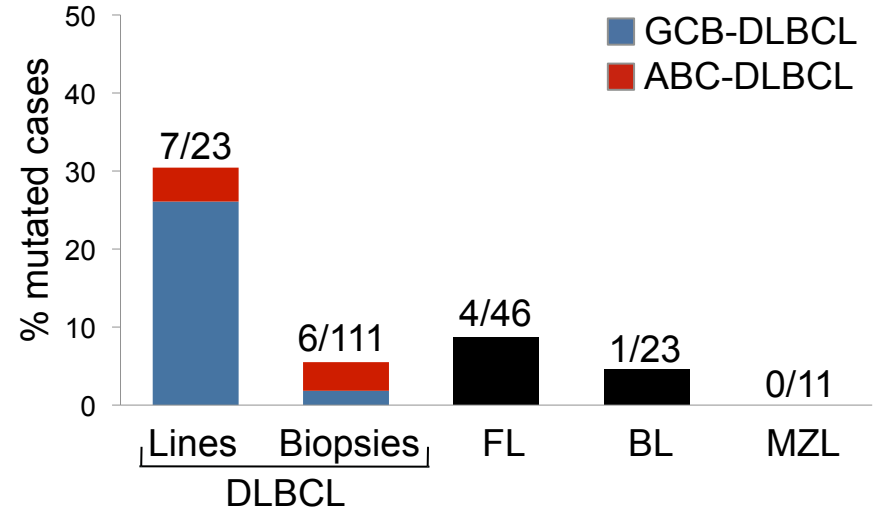

**c**

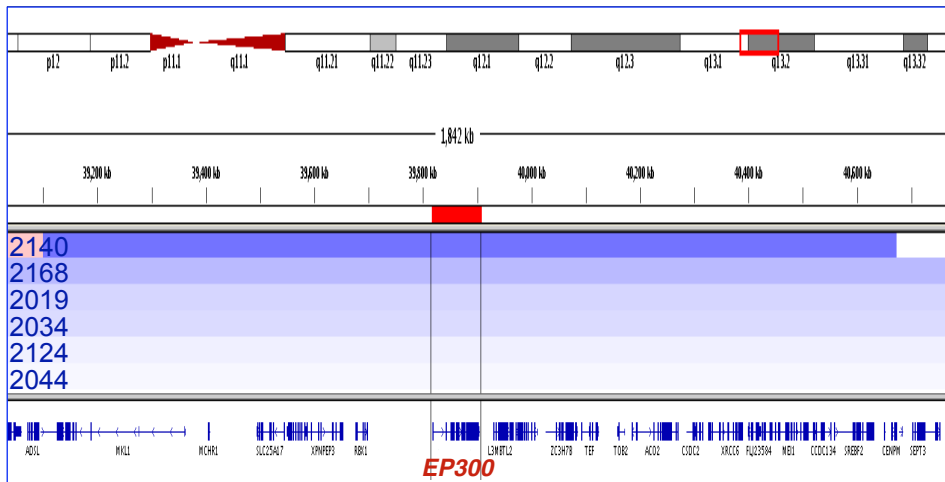

**d**

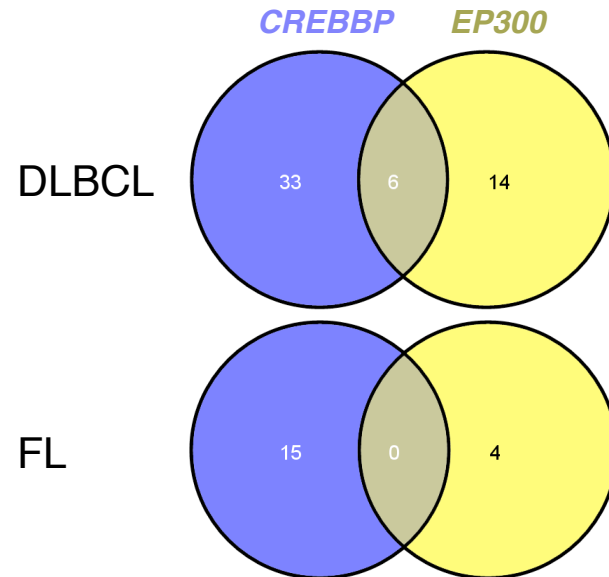

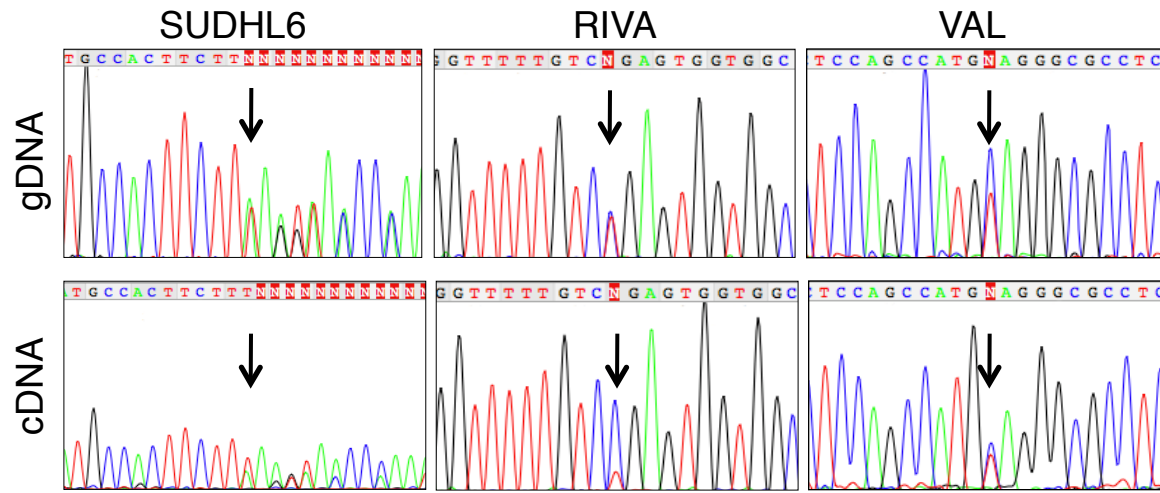

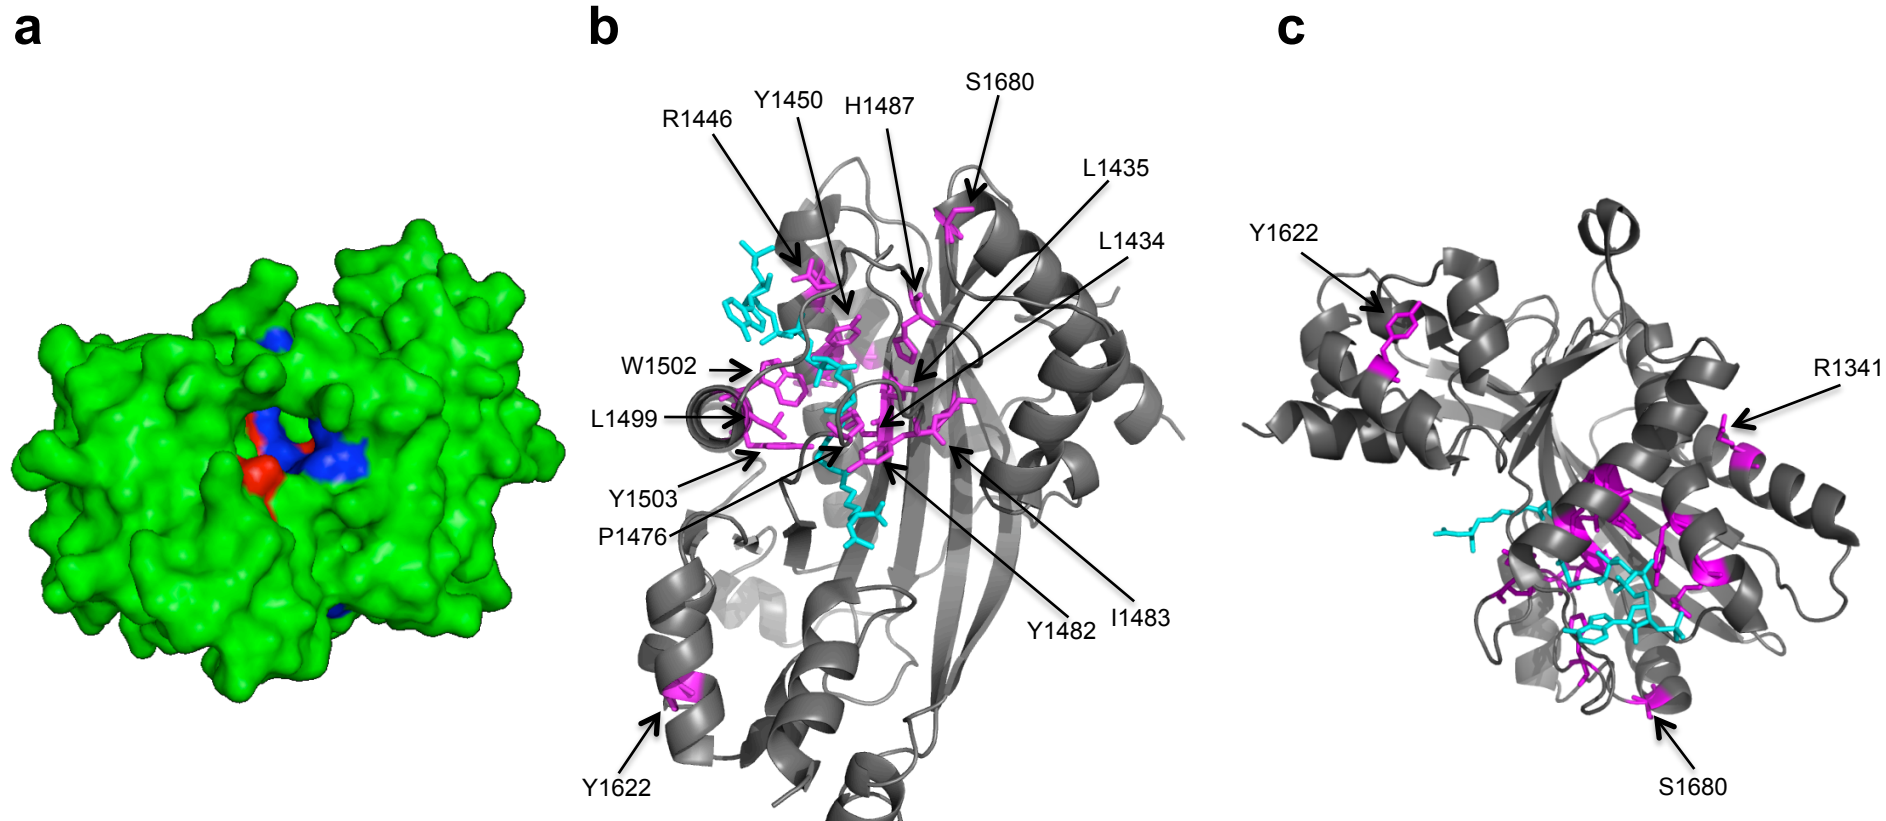

**a**

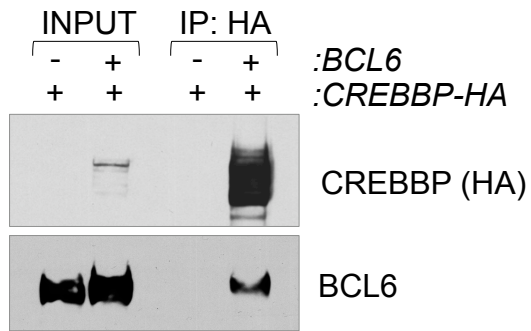

**b**

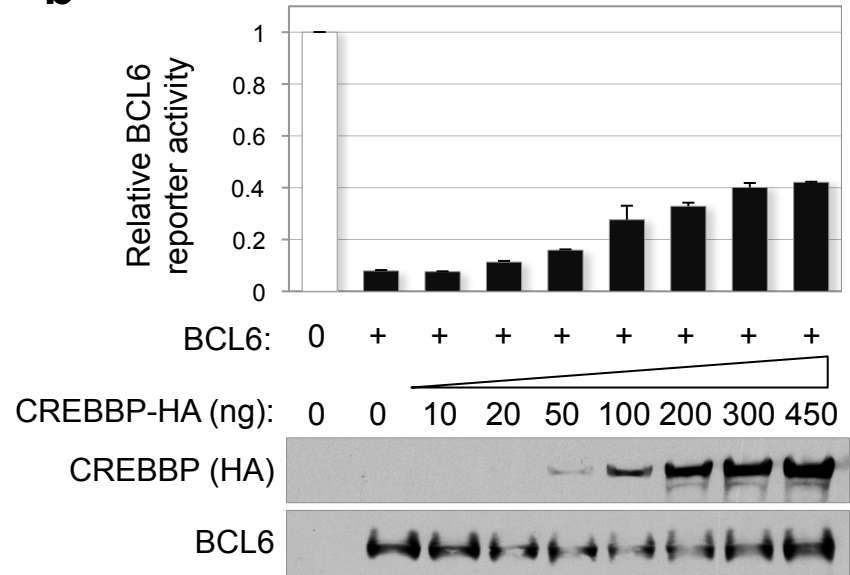



**a**

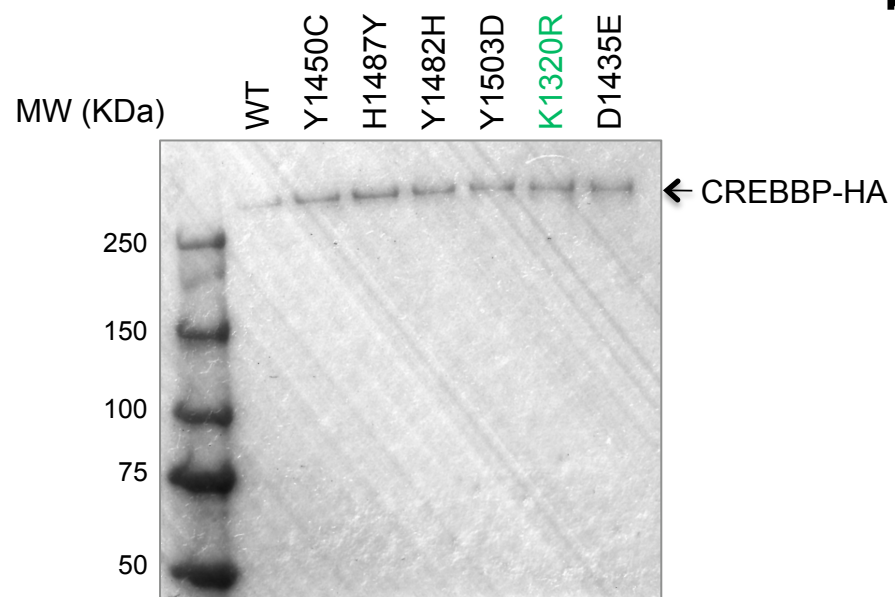

**b**

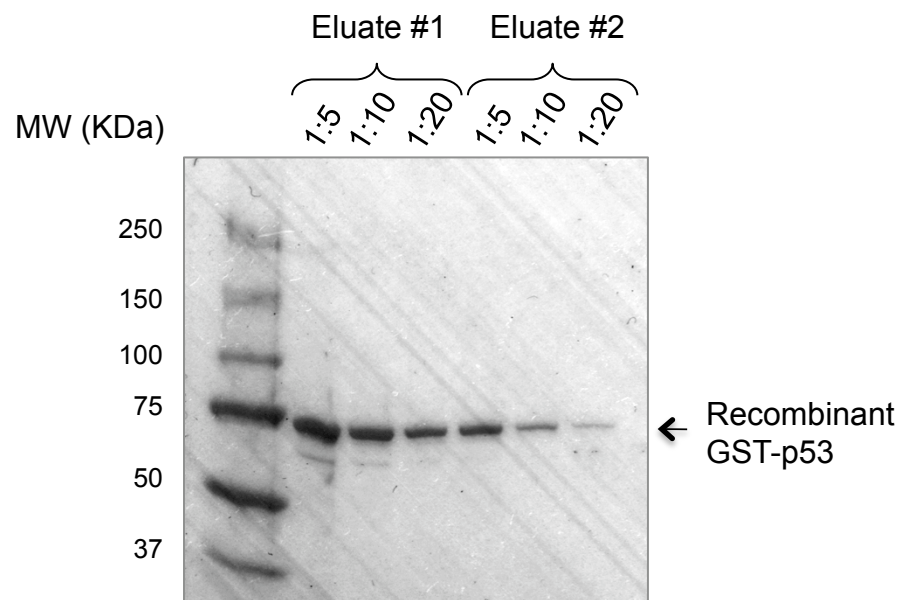

**a**

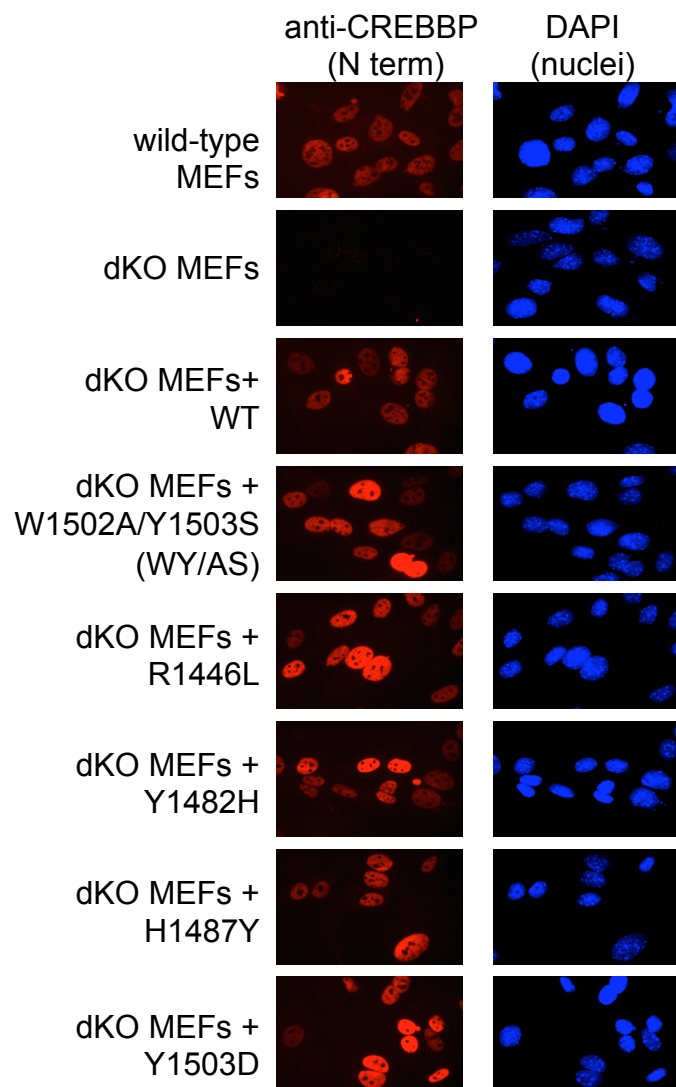

**b**

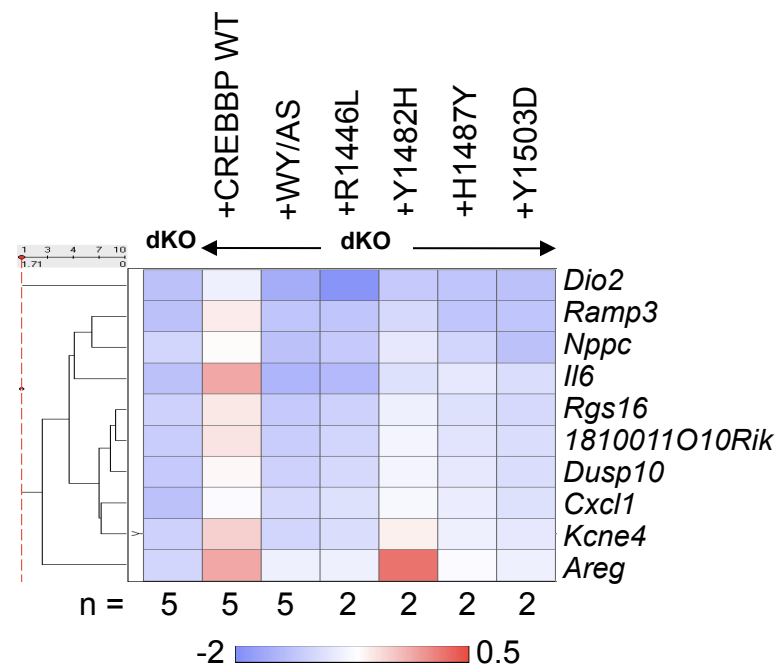

**c**

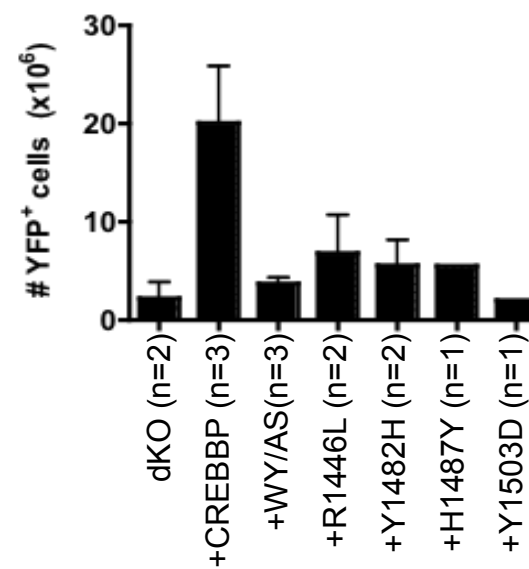

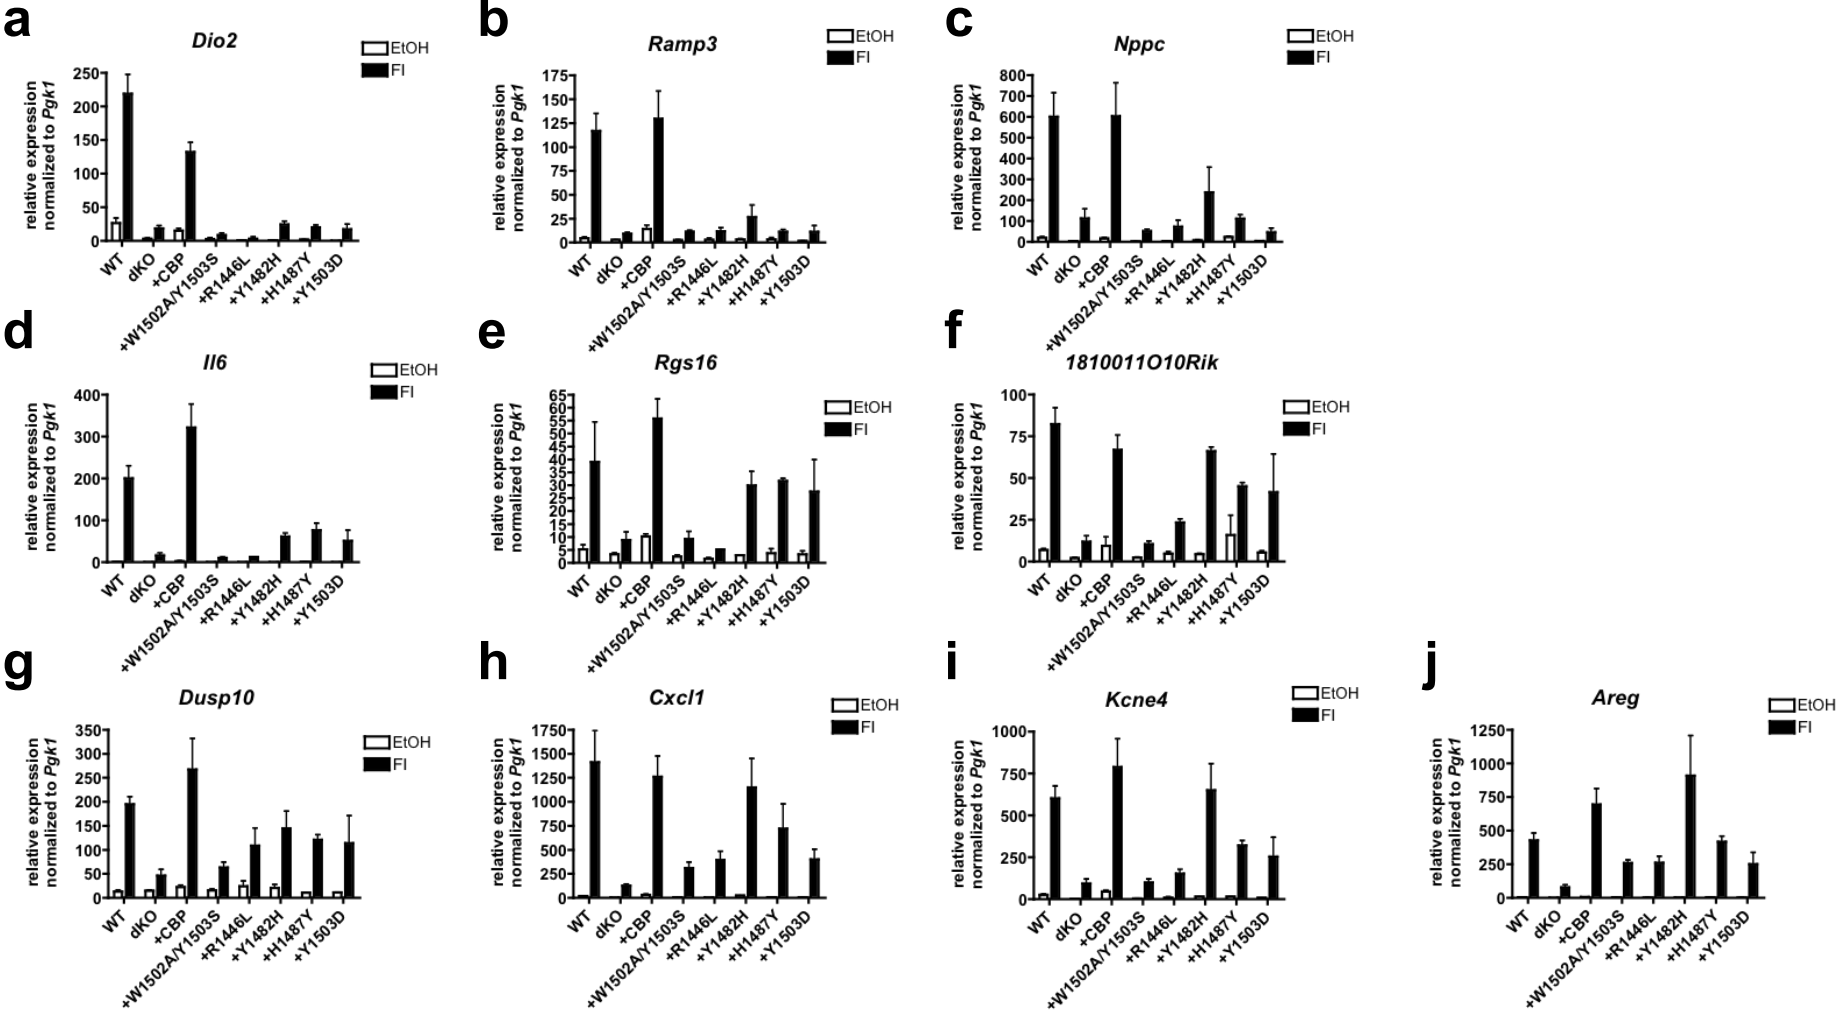



**a**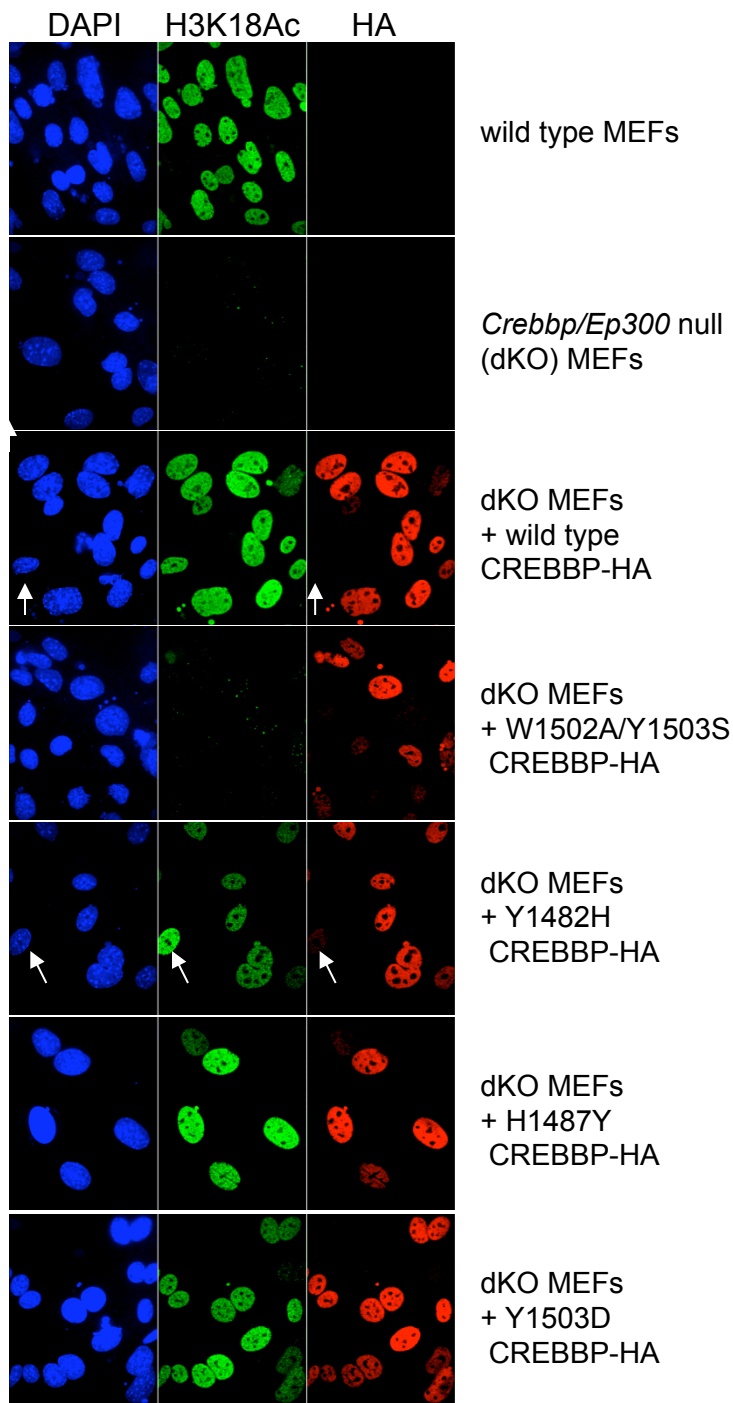**b**

Pasqualucci\_Figure S11

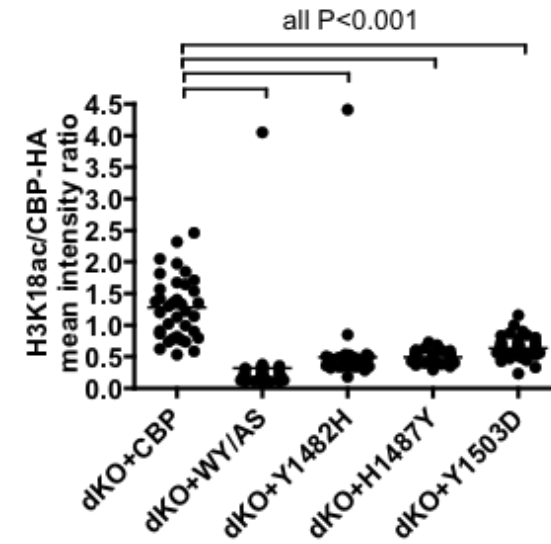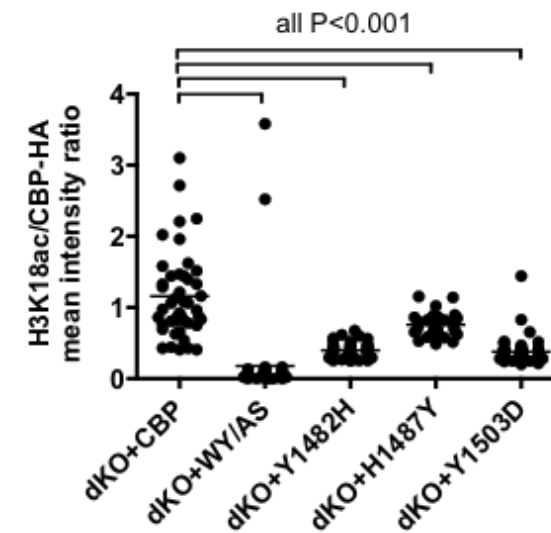

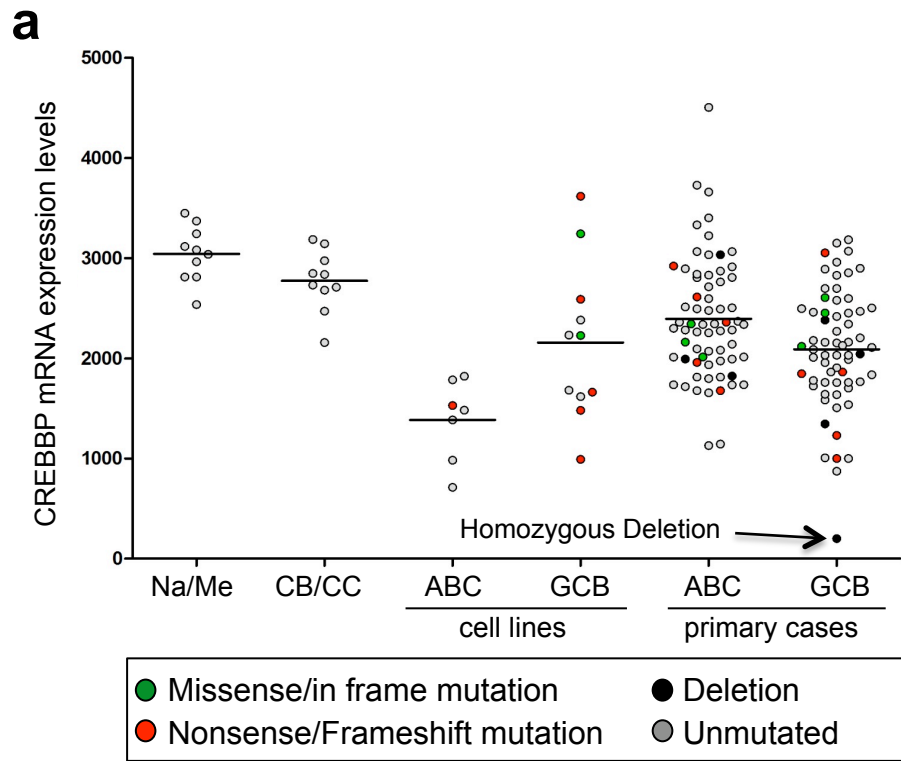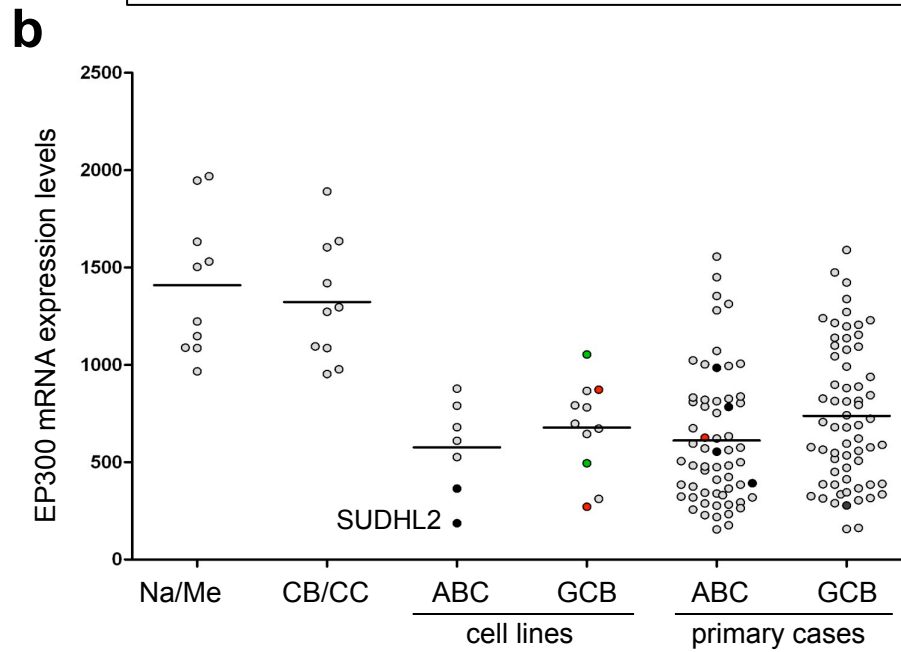

**Table S1. Mutations of the CREBBP gene in B-NHL**

| Sample ID                               | Diagnosis    | Exon | Nucleotide change*     | AA change*          | Affected Domain           | HAT activity <sup>^^</sup> |
|-----------------------------------------|--------------|------|------------------------|---------------------|---------------------------|----------------------------|
| <b>Missense/In-frame Mutations</b>      |              |      |                        |                     |                           |                            |
| 2108                                    | ABC-DLBCL    | E16  | C3362T                 | P1053L              | interdomain region        | retained                   |
| FARAGE                                  | GCB-DLBCL    | E16  | G3441T                 | Q1079H              | interdomain region        | retained                   |
| Ly8                                     | GCB-DLBCL    | E20  | T3922C                 | C1240R              | PHD domain                | retained                   |
| 2040 <sup>^</sup>                       | GCB-DLBCL    | E23  | A4163G                 | K1320R              | HAT domain                | retained                   |
| 2026                                    | ABC-DLBCL    | E24  | G4226A                 | R1341Q              | HAT domain                | retained                   |
| 2062                                    | GCB-DLBCL    | E26  | T4509A                 | D1435E              | HAT domain                | lost                       |
| 2126 <sup>^</sup>                       | GCB-DLBCL    | E26  | G4541T (+/+)           | R1446L              | HAT domain                | lost                       |
| SUDHL7                                  | GCB-DLBCL    | E26  | A4553G                 | Y1450C              | HAT domain                | lost                       |
| 34t                                     | GC-DLBCL     | E27  | C4631G                 | P1476R              | HAT domain                | nd                         |
| 2134                                    | GCB-DLBCL    | E27  | T4648C                 | Y1482H              | HAT domain                | lost                       |
| WSU                                     | GCB-DLBCL    | E27  | C4663T                 | H1487Y              | HAT domain                | lost                       |
| 2015 <sup>^</sup>                       | ABC-DLBCL    | E27  | T4711G                 | Y1503D              | HAT domain                | lost                       |
| 33t <sup>^</sup>                        | GC-DLBCL     | E27  | T4711C (+/+)           | Y1503H              | HAT domain                | nd                         |
| 2109 <sup>^</sup>                       | GCB-DLBCL    | E27  | A4712T                 | Y1503F              | HAT domain                | lost                       |
| SUDHL7                                  | GCB-DLBCL    | E30  | ΔTCC (5239-5241)       | ΔS1680 <sup>#</sup> | HAT domain                | lost                       |
| 2109 <sup>^</sup>                       | GCB-DLBCL    | E30  | ΔTCC (5239-5241)       | ΔS1680 <sup>#</sup> | HAT domain                | lost                       |
| 2191                                    | GC-DLBCL     | E30  | ΔTCC (5239-5241)       | ΔS1680 <sup>#</sup> | HAT domain                | lost                       |
| FL22 <sup>^</sup>                       | FL           | E26  | A4508G                 | D1435G              | HAT domain                | nd                         |
| BOR                                     | FL           | E26  | G4541A                 | R1446H              | HAT domain                | lost                       |
| FL15 <sup>^</sup>                       | FL           | E26  | G4541T                 | R1446H              | HAT domain                | lost                       |
| FL28 <sup>^</sup>                       | FL           | E26  | C4540T                 | R1446C              | HAT domain                | nd                         |
| FL6 <sup>^</sup>                        | FL           | E26  | C4540T                 | R1446C              | HAT domain                | nd                         |
| FL8                                     | FL           | E26  | T4505C                 | L1434P              | HAT domain                | nd                         |
| FL25                                    | FL           | E27  | T4652G                 | I1483S              | HAT domain                | nd                         |
| 1518 <sup>^</sup>                       | FL           | E27  | T4700C                 | L1499P              | HAT domain                | nd                         |
| BOR                                     | FL           | E27  | G4710T                 | W1502C              | HAT domain                | nd                         |
| 1647                                    | FL           | E27  | A4712T                 | Y1503F              | HAT domain                | lost                       |
| 1514                                    | FL           | E30  | ΔTCC (5239-5241)       | ΔS1680 <sup>#</sup> | HAT domain                | lost                       |
| FL26 <sup>^</sup>                       | FL           | E30  | ΔTCC (5239-5241)       | ΔS1680 <sup>#</sup> | HAT domain                | lost                       |
| CLL44 <sup>^</sup>                      | B-CLL        | E29  | A5069G                 | Y1622C              | HAT domain                | nd                         |
| <b>Nonsense Mutations</b>               |              |      |                        |                     |                           |                            |
| 2209 <sup>^</sup>                       | non-GC-DLBCL | E2   | C427T                  | R75X                | KIX, BD, HAT, IbiD domain | lost                       |
| 2152 <sup>^</sup>                       | ABC-DLBCL    | E2   | C490T                  | Q96X                | KIX, BD, HAT, IbiD domain | lost                       |
| 2161                                    | GCB-DLBCL    | E2   | C670T                  | Q156X               | KIX, BD, HAT, IbiD domain | lost                       |
| VAL                                     | GCB-DLBCL    | E2   | C898T                  | Q232X               | KIX, BD, HAT, IbiD domain | lost                       |
| 2179                                    | GCB-DLBCL    | E12  | C2458T                 | Q752X <sup>#</sup>  | KIX, BD, HAT, IbiD domain | lost                       |
| 2106                                    | GCB-DLBCL    | E18  | C3721T                 | R1173X <sup>#</sup> | BD, HAT, IbiD domain      | lost                       |
| 2040 <sup>^</sup>                       | GCB-DLBCL    | E23  | A4171T                 | K1323X              | HAT, IbiD domain          | lost                       |
| 2020                                    | GCB-DLBCL    | E24  | C4225T                 | R1341X              | HAT, IbiD domain          | lost                       |
| RIVA                                    | ABC-DLBCL    | E24  | C4282T                 | R1360X              | HAT, IbiD domain          | lost                       |
| FL7                                     | FL           | E18  | T3579A                 | Y1125X <sup>#</sup> | BD, HAT, IbiD domain      | lost                       |
| FL17                                    | FL           | E20  | T3906G                 | Y1234X              | BD, HAT, IbiD domain      | lost                       |
| <b>Frameshift/Splice Site Mutations</b> |              |      |                        |                     |                           |                            |
| 2183                                    | ABC-DLBCL    | E6   | dupl CCAT (1535-1538)  | L446fs              | KIX, BD, HAT, IbiD domain | lost                       |
| SUDHL8                                  | GCB-DLBCL    | I6   | T(+2)C                 | L525fs              | KIX, BD, HAT, IbiD domain | lost                       |
| SUDHL6                                  | GCB-DLBCL    | E6   | ΔT (1611)              | L470X               | KIX, BD, HAT, IbiD domain | lost                       |
| Ly1                                     | GCB-DLBCL    | E8   | ΔC (1922)              | T573fs              | KIX, BD, HAT, IbiD domain | lost                       |
| Ly8                                     | GCB-DLBCL    | E17  | ΔCT (3505-3506)        | L1101fs             | BD, HAT, IbiD domain      | lost                       |
| 2170                                    | ABC-DLBCL    | E17  | dupl 40bp (3465-3505)  | L1101fs             | BD, HAT, IbiD domain      | lost                       |
| 2069 <sup>^</sup>                       | ABC-DLBCL    | E28  | dupl GCACT (4907-4911) | S1572fs             | HAT domain                | lost                       |
| SUDHL10                                 | GCB-DLBCL    | E31  | ΔC (6035)              | A1944fs             | IbiD domain               | nd                         |
| 1546                                    | FL           | E15  | A3263T (splice site)   | E1020fs             | BD, HAT, IbiD domain      | lost                       |
| 1536 <sup>^</sup>                       | FL           | E25  | ΔC (4428)              | C1408fs             | HAT domain                | lost                       |

\*Numbering according to GenBank accession No. NM\_004380.2 (mRNA) and NP\_004371.2 (protein) respectively.

<sup>#</sup> These mutations were also reported in RTS patients (see Roelfsema and Peters, 2007; Schorry et al, 2008; and Leiden Open Variation Database at <http://chromium.liacs.nl/LOVD2/home.php>).

<sup>^</sup> For these samples, paired normal DNA was available and confirmed the somatic origin of the mutation.

<sup>^^</sup> as assessed by in vivo acetylation assays (missense mutations) and/or by prediction (nonsense mutations)

Abbreviations: ABC, activated B cell type; GCB, germinal center B cell type; NC, unclassified; non-GC and GC, non germinal center and germinal center type, respectively (based on IHC); FL, follicular lymphoma; B-CLL, B-cell chronic lymphocytic leukemia; Δ, deletion; I, intron; fs, frameshift; dupl, duplication; +/+, hemizygous mutation; nd, not determined.

KIX, CREB-binding; BD, bromodomain; PHD, plant homeodomain; HAT, histone acetyltransferase; IbiD, IRF3-binding

**Table S2. SNP array copy number analysis of the CREBBP gene in DLBCL**

| Sample ID           | DLBCL Subtype | Chr | Cytoband          | Start position* | End position* | Mean CN | Size (Kb) | Aberration               | No.of Genes | Annotated genes in the region**                  |
|---------------------|---------------|-----|-------------------|-----------------|---------------|---------|-----------|--------------------------|-------------|--------------------------------------------------|
| 2101                | non-GC        | 16  | 16p13.3           | 3681563         | 3738462       | 1.48    | 56.9      | loss                     | 2           | CREBBP, TRAP1                                    |
| 2043                | ABC           | 16  | 16p13.3           | 3756551         | 3864655       | 1.21    | 108.1     | loss                     | 1           | CREBBP                                           |
| 2147                | GCB           | 16  | 16p13.3           | 3838219         | 3949571       | 0.65    | 111.4     | loss                     | 1           | CREBBP                                           |
| 2147                | GCB           | 16  | 16p13.3           | 3547655         | 3836389       | 1.35    | 288.7     | loss                     | 5           | BTBD12, CREBBP, DNASE1, NLRC3, TRAP1             |
| 2075                | GCB           | 16  | 16p13.3           | 3580275         | 3818710       | 1.51    | 238.4     | loss                     | 4           | BTBD12, CREBBP, DNASE1, TRAP1                    |
| SUDHL5 <sup>^</sup> | GCB           | 16  | 16p13.3           | 3636366         | 4282743       | 1.05    | 646.4     | loss                     | 7           | BTBD12, CREBBP, DNASE1, TRAP1, ADCY9, SRL, TFAP4 |
| 2023                | GCB           | 16  | 16p13.3           | 765             | 5547879       | 1.80    | 5547.1    | loss                     | 206         | CREBBP and >200 other genes                      |
| 2046                | GCB/NC        | 16  | 16p13.3           | 765             | 5547879       | 1.78    | 5547.1    | loss                     | 206         | CREBBP and >200 other genes                      |
| 2019                | ABC           | 16  | 16p13.3 - 16q21   | 26113           | 62521051      | 1.67    | 62494.9   | loss                     | 525         | CREBBP and >200 other genes                      |
| 2122                | GC            | 16  | 16p13.3 - 16q24.3 | 765             | 88815024      | 1.64    | 88814.3   | loss (entire chromosome) | 776         | CREBBP and >200 other genes                      |

\* Numbering according to NCBI Build 36.1. Position 765 corresponds to the first marker on chromosome 16 in the Affymetrix SNP6.0 array.

\*\*NCBI RefSeq database.

Abbreviations: ABC, activated B cell type; GCB, germinal center B cell type; NC, unclassified; non-GC and GC, non germinal center and germinal center type, respectively (based on immunohistochemistry).

<sup>^</sup> Data for the SUDHL5 cell line were obtained from the Tumorscape database at <http://www.broadinstitute.org/tumorscape>, and were confirmed by FISH analysis using BAC clone RP11-292B10 and a control centromere 16 probe.

**Table S3. Mutations of the *EP300* gene in B-NHL**

| Sample ID                               | Diagnosis | Exon    | Nucleotide change*                | AA change*                | Affected Domain           |
|-----------------------------------------|-----------|---------|-----------------------------------|---------------------------|---------------------------|
| <b>Missense/In-frame Mutations</b>      |           |         |                                   |                           |                           |
| 2180                                    | ABC-DLBCL | E2      | A771G                             | M126V                     | none                      |
| 2161                                    | GCB-DLBCL | E6      | A1914G                            | S507G                     | none                      |
| 2141                                    | ABC-DLBCL | E9      | G2163C                            | A590P                     | KIX domain                |
| 2025 <sup>^</sup>                       | ABC-DLBCL | E14     | C3168A                            | P925T                     | none                      |
| FL1                                     | FL        | E26     | T4584C                            | H1397Y                    | HAT domain                |
| DB                                      | GCB-DLBCL | E28     | G4912T                            | G1506V                    | HAT domain                |
| SUDHL8                                  | GCB-DLBCL | E29     | A5105T                            | K1570N                    | HAT domain                |
| SUDHL10                                 | GCB-DLBCL | E30     | G5191A                            | R1599H                    | HAT domain                |
| SUDHL6                                  | GCB-DLBCL | E30     | C5274T                            | R1627W                    | HAT domain                |
| 2041                                    | NC-DLBCL  | E31     | A6106C                            | Q1904P                    | none                      |
| FL14                                    | FL        | E31     | A6918C                            | M2175L                    | none                      |
| 2135                                    | ABC-DLBCL | E31     | $\Delta$ CAGCAGCAACAG (6969-6980) | $\Delta$ 4Q (2192-2195)   | none                      |
| FL19                                    | FL        | E31     | $\Delta$ 12bp (7022-7033)         | $\Delta$ QFQQ (2210-2213) | none                      |
| <b>Nonsense Mutations</b>               |           |         |                                   |                           |                           |
| RAMOS                                   | BL        | E2      | C582T                             | Q63X                      | KIX, BD, HAT, IbiD domain |
| SUDHL2                                  | ABC-DLBCL | E14     | C2856T (+/+)                      | Q821X                     | KIX, BD, HAT, IbiD domain |
| <b>Frameshift/Splice Site Mutations</b> |           |         |                                   |                           |                           |
| BJAB                                    | GCB-DLBCL | E24/I24 | G(i24+1)A                         | $\Delta$ E24 (R1292fs)**  | HAT, IbiD domain          |
| FARAGE                                  | GCB-DLBCL | E27     | $\Delta$ A4803                    | M1470fs                   | HAT, IbiD domain          |
| SUDHL8                                  | GCB-DLBCL | E29     | $\Delta$ A5031                    | K1547fs                   | HAT, IbiD domain          |
| 1658                                    | FL        | E28/I28 | G(i28+1)A                         | V1540fs                   | HAT, IbiD domain          |

\*Numbering according to GenBank accession No NM\_001429.3 (mRNA) and NP\_001420.2 (protein) respectively.

Note that none of these mutations has been previously observed in RTS patients (see Roelfsema and Peters, 2007; Bartsch et al, 2009; and Leiden Open Variants Database at <http://chromium.liacs.nl/LOVD2/home.php>).

\*\* as verified by cDNA amplification followed by both direct sequencing and sequencing of individual clones.

<sup>^</sup> For this sample, paired normal DNA was available and confirmed the somatic origin of the mutation. One additional sequence variant identified in 4 patients (G1026A, corresponding to AA change G211S) most likely represents a germline polymorphism since, although no matched normal tissue was available for these patients, the same change was present in normal DNA in a separate study (Ref. 34).

Abbreviations: ABC, activated B cell type; GCB, germinal center B cell type; NC, unclassified; FL, follicular lymphoma; BL, Burkitt lymphoma;  $\Delta$ , deletion; I, intron; fs, frameshift; +/+, hemizygous mutation

**Table S4. SNP array copy number analysis of the *EP300* gene in DLBCL**

| Sample ID <sup>^</sup> | DLBCL Subtype | Chr | Cytoband            | Start position* | End position* | Mean CN | Size (Kb) | Aberration               | No. of Genes | Annotated genes in the region** |
|------------------------|---------------|-----|---------------------|-----------------|---------------|---------|-----------|--------------------------|--------------|---------------------------------|
| 2140                   | GC            | 22  | 22q13.1 - 22q13.2   | 39102833        | 40674243      | 1.10    | 1571.41   | loss                     | 28           | EP300 and 27 other genes        |
| 2168                   | ABC           | 22  | 22q11.21 - 22q13.33 | 20175343        | 49535360      | 1.60    | 29360.02  | loss                     | 352          | EP300 and >200 other genes      |
| 2019                   | ABC           | 22  | 22q11.1 - q13.33    | 14432516        | 49581309      | 1.64    | 35148.79  | loss (entire chromosome) | 416          | EP300 and >200 other genes      |
| 2034                   | ABC           | 22  | 22q11.1 - 22q13.33  | 14805205        | 49518684      | 1.44    | 34713.48  | loss (entire chromosome) | 412          | EP300 and >200 other genes      |
| 2124                   | GCB           | 22  | 22q11.1 - 22q13.33  | 14432516        | 49581309      | 1.81    | 35148.79  | loss (entire chromosome) | 416          | EP300 and >200 other genes      |
| 2044                   | ABC           | 22  | 22q11.1 - 22q13.33  | 14857504        | 49581309      | 1.82    | 34723.81  | loss (entire chromosome) | 414          | EP300 and >200 other genes      |

<sup>^</sup> Two additional cell lines carrying aberrant *EP300* alleles include SUHDL2, which showed a monoallelic gene deletion by FISH analysis using a labeled probe for the *EP300* locus (BAC RP11-1078O11) and a control probe for chromosome 22, and RC-K8 (Garbati et al., Ref. 30 of the manuscript)

\* Numbering according to NCBI Build 36.1.

\*\*NCBI RefSeq database.

Abbreviations: ABC, activated B cell type; GCB, germinal center B cell type; GC, germinal center type (based on immunohistochemistry).

**Table S5. Oligonucleotides used for genomic amplification of the *CREBBP* gene**

| Exon       | Oligonucleotide name | Position <sup>^</sup> | Oligonucleotide Sequence (5'-3') |
|------------|----------------------|-----------------------|----------------------------------|
| Exon 1     | CREBBP-E1F1          | 13*                   | GTTGCTGTGGCTGAGATTTG             |
|            | CREBBP-E1R1          | +463                  | GACAGTCTGCGACGAACTT              |
| Exon 2-I   | CREBBP-E2F1          | +781                  | ACTTTCCAACCTGCCTGACCTG           |
|            | CREBBP-E2R1          | 743*                  | ACTTTAACCAGACCCACCCAG            |
| Exon 2-II  | CREBBP-E2F2          | 943*                  | AAACCTGCGTTAGGGTCTCAG            |
|            | CREBBP-E2R2          | 368*                  | ACAGTGGGAACCTTGTTCAG             |
| Exon 2-III | CREBBP-E2F3          | 779*                  | TTACTATTGAGGAGGCCTGGG            |
|            | CREBBP-E2R3          | -73                   | TCATAGAAACGTGGCAGTTGG            |
| Exon 3     | CREBBP-E3F           | +200                  | CCTCACCTATCTCTCCTGTTGC           |
|            | CREBBP-E3R           | -80                   | AACTGTGTGAGCATTTCACAG            |
| Exon 4     | CREBBP-E4F           | +323                  | TGAACCAGAGAGCTGCTGTAAG           |
|            | CREBBP-E4R           | -107                  | TGGTCGGTATTATCCATCAGC            |
| Exon 5     | CREBBP-E5F           | +202                  | CTGCCCACTCCCTACCTACTC            |
|            | CREBBP-E5R           | -240                  | GCCCTTTATCACCCATCCTTC            |
| Exon 6     | CREBBP-E6F           | +316                  | TTGGGTTCCATCACTCCATTC            |
|            | CREBBP-E6R           | -149                  | TTCTCCCTAGGCTTGTACTGC            |
| Exon 7     | CREBBP-E7F           | +327                  | AAGTCAGGAGAGCCAAGTGATG           |
|            | CREBBP-E7R           | -101                  | CACCAATTGTTTATATGGTGGC           |
| Exon 8     | CREBBP-E8F           | +249                  | GCACGTGACTTGTATAGGCTCC           |
|            | CREBBP-E8R           | -124                  | ACATCACTTGGCTCTCCTGAC            |
| Exon 9     | CREBBP-E9F           | +263                  | GGAAGTCTCCTTGGTCAGTGG            |
|            | CREBBP-E9R           | -161                  | GCCAGGCAGATCTCAAACCTG            |
| Exon 10    | CREBBP-E10F          | +298                  | ACATCAACAGCTTCTGCAGGG            |
|            | CREBBP-E10R          | -145                  | TGGGCTTCTGGTGTATCAGG             |
| Exon 11    | CREBBP-E11F          | +148                  | GAAAGGGTTAGAAAGAAATATACAGGG      |
|            | CREBBP-E11R          | -191                  | GGACACTGAGTTTCTCTCTTGGG          |
| Exon 12    | CREBBP-E12F          | +208                  | CAAGTGACATGAATTCTGCTGC           |
|            | CREBBP-E12R          | -112                  | TTCTGTTGCCTGTGCGTTC              |
| Exon 13    | CREBBP-E13F          | +300                  | AGACATGAAATGTGCATTCTGG           |
|            | CREBBP-E13R          | -78                   | GGATCATTCTGGCTCACCTTG            |
| Exon 14    | CREBBP-E14F1         | +558                  | CAAGTGATTCTCCACCTTGG             |
|            | CREBBP-E14R1         | -11                   | ATTTCTGGTAGGGACAGGTGCC           |
| Exon 15    | CREBBP-E15F          | +311                  | CCGAACCCACATTCAAACAG             |
|            | CREBBP-E15R          | -83                   | ATTGTAGGTTGCATGAGCAGC            |
| Exon 16    | CREBBP-E16F          | +350                  | CCTGAGTGTTTCTGCAGGG              |
|            | CREBBP-E16R          | -83                   | AGGCTTGTAAGAGTCTTCCCG            |
| Exon 17    | CREBBP-E17F          | +231                  | AGAACAATCTTCAAGGCAGGG            |
|            | CREBBP-E17R          | -93                   | ATGTACAGCAGCCAGGATTC             |
| Exon 18    | CREBBP-E18F          | +328                  | CCAGTATACAGGCGTGGTCTC            |
|            | CREBBP-E18R          | -131                  | TTCTTACTGTTGGGAATGGAAGT          |
| Exon 19    | CREBBP-E19F1         | -163                  | TCACATGCTATCCCAAATGTC            |
|            | CREBBP-E19R1         | +176                  | TTCAGGAAAGAAATAATGTACA           |
| Exon 20    | CREBBP-E20F          | +176                  | GGCACCGGTACCTTCCTTATAG           |
|            | CREBBP-E20R          | -149                  | TTTCATTGTCCTCACTGACCC            |
| Exon 21    | CREBBP-E21F          | +139                  | ACCCACAACCCACTCCATAAG            |
|            | CREBBP-E21R          | -259                  | GGGCAACAGAGCAAGACC               |
| Exon 22    | CREBBP-E22F          | +238                  | AAGCGGACAAACGCTTAGAAC            |
|            | CREBBP-E22R          | -83                   | GTGGACGCACACAGACTTC              |
| Exon 23    | CREBBP-E23F          | +165                  | GAACCATGTGTTGAGAGGAACC           |

|              |               |        |                         |
|--------------|---------------|--------|-------------------------|
|              | CREBBP-E23R   | -178   | AAGTTCTAAGCGTTTGTCCGC   |
| Exon 24      | CREBBP-E24F1  | -132   | TTCCGTGTTTGGAGAACATT    |
|              | CREBBP-E24R1  | +317   | TAAAACCCCGAGACAGGACAA   |
| Exon 25      | CREBBP-E25F   | +221   | GGACACTTAAGAGCCCTGGTC   |
|              | CREBBP-E25R   | -225   | CATTACAGAGGTGCAGTTCC    |
| Exon 26      | CREBBP-E26F   | +268   | CACCTGGAAAGAGGAGCTTTG   |
|              | CREBBP-E26R   | -78    | CAGGGTGTTGTTTGTGCTTG    |
| Exon 27      | CREBBP-E27F   | +376   | CTCCAAGTGTGCTGCTCTCAG   |
|              | CREBBP-E27R   | -96    | TCCTGGCTTTAGTCCTTGCTC   |
| Exon 28      | CREBBP-E28F   | +259   | AGGACCTAACAGTCGACACGC   |
|              | CREBBP-E28R   | -122   | CACACATGCATGGGACTCTG    |
| Exon 29      | CREBBP-E29F   | +268   | ACTTCCCTCCCACCACAGAC    |
|              | CREBBP-E29R   | -111   | GTGACCTACTTTGGCCTGAGC   |
| Exon 30      | CREBBP-E30F   | +389   | CAGCCACCATCAGGTACAGAC   |
|              | CREBBP-E30R   | -107   | CTCAGCCACCTGCCTATTCTG   |
| Exon 31-I    | CREBBP-E31F12 | 5756*  | CGGAGCTTGTGTTTGTGTTG    |
|              | CREBBP-E31R12 | -198   | GTCCATGATCCCATCTTGTCC   |
| Exon 31-II   | CREBBP-E31F11 | 5965*  | AGCCAGCTGGTGACATGC      |
|              | CREBBP-E31R11 | 5581*  | CCATCCTGCCAGAAGATGAAG   |
| Exon 31-III  | CREBBP-E31F10 | 6030*  | CACCTGGCTGGTAGGCTTC     |
|              | CREBBP-E31R10 | 5731*  | TGCCTCAACATCAAACACAAG   |
| Exon 31-IV   | CREBBP-E31F9  | 6230*  | CTCACCTGGTTGGGTCGG      |
|              | CREBBP-E31R9  | 5842-* | CAGAGTCTGCCTTCTCCTACCTC |
| Exon 31-V    | CREBBP-E31F8  | 6395*  | GGTGAGATGCTCCTGGGTG     |
|              | CREBBP-E31R8  | 6006*  | CACAGGGAAGCCTACCAGC     |
| Exon 31-VI   | CREBBP-E31F7  | 6509*  | TTGATGAAAGCTGCCATTAGC   |
|              | CREBBP-E31R7  | 6113*  | AGCACCTGTACCGGGTGAAC    |
| Exon 31-VII  | CREBBP-E31F6  | 6639*  | CATGGCATTGAGTTCTGC      |
|              | CREBBP-E31R6  | 6313*  | CCTGTGATATCCATGCAGGC    |
| Exon 31-VIII | CREBBP-E31F5  | 6792*  | CTGCCTCCGTAACATTTCTCG   |
|              | CREBBP-E31R5  | 6400*  | GCTCTGCAAGACCTGCTGC     |
| Exon 31-IX   | CREBBP-E31F4  | 6913*  | GTCCTTGAGGCTGCTGGAAC    |
|              | CREBBP-E31R4  | 6521*  | CCAAGTACGTGGCCAATCAG    |
| Exon 31-X    | CREBBP-E31F3  | 7234*  | GCACCTGGTTACTAAGGGACG   |
|              | CREBBP-E31R3  | 6714*  | CTTGAACATCATGAACCCAGG   |
| Exon 31-XI   | CREBBP-E31F2  | 7406*  | CCCAAGTGTCCCTGATCTATG   |
|              | CREBBP-E31R2  | 7060*  | AACATCCAGCAAGCCCTG      |
| Exon 31-XII  | CREBBP-E31F1  | 7655*  | ATCCACCCTTCCATGGCTC     |
|              | CREBBP-E31R1  | 7269*  | GTCCCAGCCTCCACATTCC     |

^ Numbers indicate the distance from the corresponding exon, except where indicated by an asterisk (primers annealing to cDNA sequences)

\* Numbering according to GenBank accession No NM\_004380.2



**Table S6. Oligonucleotides used for genomic amplification of the *EP300* gene**

| Exon        | Oligonucleotide name | Position <sup>^</sup> | Oligonucleotide Sequence (5'-3') |
|-------------|----------------------|-----------------------|----------------------------------|
| Exon 1      | EP300-E1F            | 206*                  | TTTCTATCGAGTCCGCATCC             |
|             | EP300-E1R            | +73                   | AATGGAAGAATAAAGGCCGCAC           |
| Exon 2      | EP300-E2F            | -111                  | CATGGAGTGAGGTTGGGAAAT            |
|             | EP300-E2R            | +82                   | ACAATGTAAGGCAAACCCTCC            |
| Exon 3      | EP300-E3F            | -151                  | TCACGTTGCCCAAGCTGTAG             |
|             | EP300-E3R            | +111                  | GCTCCTAGTGGGTACAAATCCC           |
| Exon 4      | EP300-E4F            | -148                  | TGGTTTATGCATTCCCTGTGT            |
|             | EP300-E4R            | +130                  | CATACAGACACCATCACCACAA           |
| Exon 5      | EP300-E5F            | -201                  | CTTTGTGCAAATTGCTTACCC            |
|             | EP300-E5R            | +100                  | CAACACCACAGGTCCCTCAC             |
| Exon 6      | EP300-E6F            | -135                  | TGGAAGACAAGATCCACATACTC          |
|             | EP300-E6R            | +189                  | GGAAGATACAAACCAGTGGCA            |
| Exon 7      | EP300-E7F            | -171                  | GGTGCTTCAAATCAGCCTTTAC           |
|             | EP300-E7R            | +106                  | AAAGACATCCTCAAACCGAGG            |
| Exon 8      | EP300-E8F            | -136                  | CCCTGCCTAGCTCCTTAATGC            |
|             | EP300-E8R            | +192                  | ATGATGGTGGGAAAGGTTGAG            |
| Exon 9      | EP300-E9F            | -202                  | AGAGTCATTTCTTATATTGTGAACGG       |
|             | EP300-E9R            | +100                  | CCGTCTGAAGCATATGTACTACTTG        |
| Exon 10     | EP300-E10F           | -125                  | TGGCACCAGTTCTTAATGCAG            |
|             | EP300-E10R           | +203                  | GTTAAGTACCATGCCCAGACATC          |
| Exon 11     | EP300-E11F           | -207                  | CAACAAATCCACTTGGAGGC             |
|             | EP300-E11R           | +84                   | TAAAGCGGGTGTTGAGGTAGC            |
| Exon 12     | EP300-E12F           | -190                  | AGAATGGTGTGAACCCAGGTG            |
|             | EP300-E12R           | +200                  | CACTGACACTCCAGGGACAAG            |
| Exon 13     | EP300-E13F           | -90                   | GCCTGACGTTAGGAGCATTTG            |
|             | EP300-E13R           | +95                   | ACCCACTATTTGCTGCCACTC            |
| Exon 14     | EP300-E14F           | -169                  | TGTCCAAAGATACATGCCCAG            |
|             | EP300-E14R           | +81                   | AGAGAATGGAAATGGCCCAG             |
| Exons 15-16 | EP300-E15F           | -100                  | GGTGGCTAATTCTGCTATCCTG           |
|             | EP300-E16R           | +102                  | CAATAATGGCAACTTCTGAGGC           |
| Exon 17     | EP300-E17F           | -181                  | AACAAAGCGGGGCTTAGAAT             |
|             | EP300-E17R           | +88                   | TGGCTATACTGTTTGAATGTGA           |
| Exon 18     | EP300-E18F           | -124                  | GGGAATATAGACAGGCCAGAAAC          |
|             | EP300-E18R           | +91                   | CAGAAGCAGGATATTCTCTTATCCC        |
| Exon 19     | EP300-E19F           | -140                  | TCAGGAACTGAATTAGCCCATC           |
|             | EP300-E19R           | +86                   | CATGACTGTATGTGTGCTGGC            |
| Exon 20     | EP300-E20F           | -72                   | GCTTCGTTGCTTGGCTTG               |
|             | EP300-E20R           | +300                  | CCCATTGCTGACATATTCCC             |
| Exon 21     | EP300-E21F           | -232                  | TTCTGGGTTCTCCATTTCTG             |
|             | EP300-E21R           | +88                   | TCATCTGATTGGTCATGCAAAC           |
| Exon 22     | EP300-E22F1          | -177                  | CCACTCCAGCCTGTACAACA             |
|             | EP300-E22R1          | +132                  | GCCAAACCCAAAGAAAACAA             |
| Exon 23     | EP300-E23F           | -204                  | TTTCTTCATGTCTGTTGCTTGA           |
|             | EP300-E23R           | +299                  | GCCAATCATTTCCACACCTTA            |
| Exons 24-25 | EP300-E24F           | -191                  | GATTAGCATGTTCCCTGCACTC           |
|             | EP300-E25R           | +114                  | TTGCATTTCAAACCAAACAC             |
| Exon 26     | EP300-E26F           | -106                  | CAAAGAGCCTGGGAGAGTGAG            |
|             | EP300-E26R           | +190                  | GGCCAACATATCCATTTCTC             |
| Exon 27     | EP300-E27F           | -94                   | GGTATCTATATCAACTCCAACCTGTGG      |
|             | EP300-E27R           | +198                  | GAATGGCATGAACCCAGG               |
| Exon 28     | EP300-E28F           | -134                  | GCTTAGGTATAAAGTCTCTGCCAGC        |
|             | EP300-E28R           | +178                  | AAAGTTTAATACCACTGAAACAGAACC      |
| Exon 29     | EP300-E29F           | -356                  | ACCAAGGTCTTCTGGCTCC              |
|             | EP300-E29R           | +373                  | GCCCAGCGAACAGTCAGT               |

|             |             |       |                        |
|-------------|-------------|-------|------------------------|
| Exon 30     | EP300-E30F  | -128  | CCATGGTGGGATAATTGCTTG  |
|             | EP300-E30R  | +74   | AAATACGTGGCTGCATGGC    |
| Exon 31-I   | EP300-E31F1 | -126  | GGCAGAGCTGAAGAGGC      |
|             | EP300-E31R1 | 6069* | CTTGAGTCCTGGGCAAGTAGG  |
| Exon 31-II  | EP300-E31F2 | 5811* | TGCCTAAACATCAAGCAGAAGC |
|             | EP300-E31R2 | 6546* | AGGCTTGTTGAGACACAGTGC  |
| Exon 31-III | EP300-E31F3 | 6463* | AACCTTTGAACATGGCTCCAC  |
|             | EP300-E31R3 | 7202* | CATCTGTTGCTGAAGGAGTCG  |
| Exon 31-IV  | EP300-E31F4 | 6918* | ATGCCTTCACAATTCCGAGAC  |
|             | EP300-E31R4 | 7515* | AAAGCATTGAATTCTGGTCCG  |
| Exon 31-V   | EP300-E31F5 | 7272* | CACCTACAAGGCCAGCAGAT   |
|             | EP300-E31R5 | 7778* | CGGCTACTGCACAGTTCTTATG |

^ Numbers indicate the distance from the corresponding exon, except where indicated by an asterisk (primers annealing to cDNA sequences)

\* Numbering according to GenBank accession No. NM\_001429.3
